# Supplementary material
Source: PubMed Central journal article supplement (PMC3135201)
Supplement: supp_jc.2010-2970_10-2970_Supp_Fig_1_tab_1.pdf [file supp_jc.2010-2970_10-2970_Supp_Fig_1_tab_1.pdf]

## **SUPPLEMENTAL DATA**

**Supplemental Table 1.** Summary of hormonal studies and medical therapies.

**Supplemental Figure 1.** Histopathology of the sphenoidal sinus mass, highlighting a marked lympho-plasmacytic infiltration rich in IgG4-producing cells. A) Sphenoidal sinus H&E, 40X. B) Sphenoidal sinus CD138, 40X. C) Sphenoidal sinus IgG4, 64X.

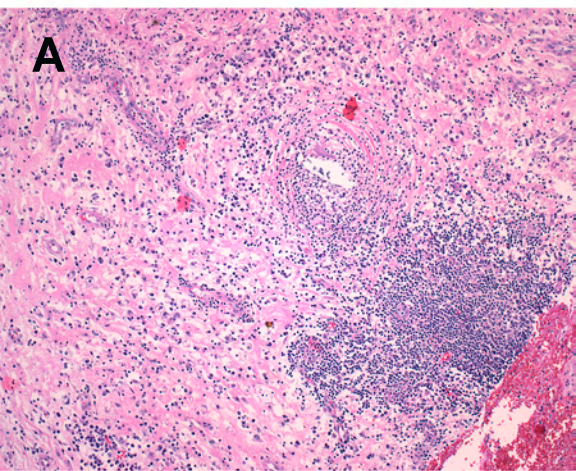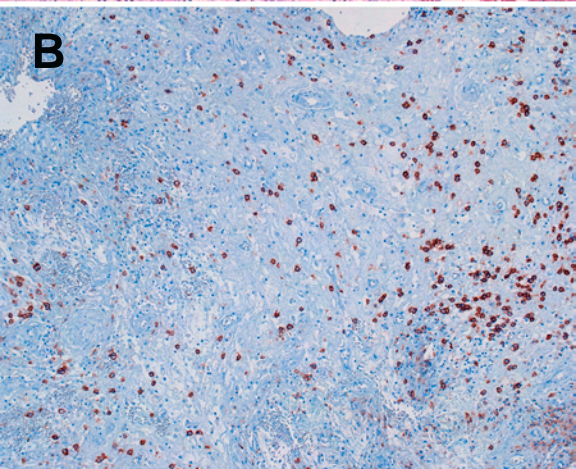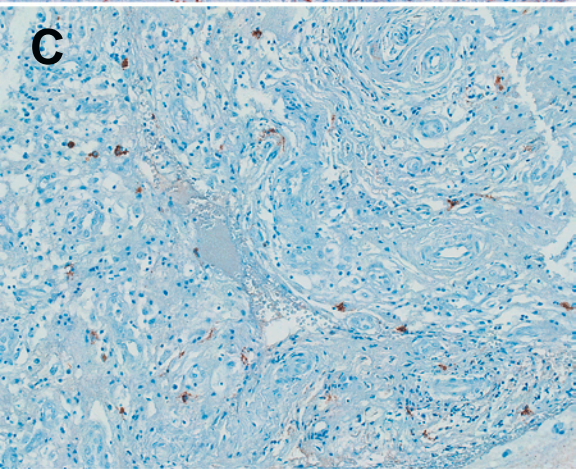

**Supplementary table 1. Summary of hormonal studies and medical therapies.**

| Date ID | Date       | Symptoms | ACTH<br>(9-52<br>pg/mL) | Cortisol<br>(85-260<br>ng/mL) | TSH<br>(0.4-3.4<br>mU/L) | FT4<br>(7-17<br>pg/mL) | LH<br>(1.4-12.7<br>mU/mL) | Testosterone<br>(2.7-10.9<br>ng/mL) | GH<br>(0.05-5<br>ng/mL) | IGF-1<br>(71-290<br>ng/mL) | PRL<br>(1-13<br>ng/mL) | Pit Abs | Cortisone<br>acetate<br>(mg/d) | Prednisone<br>(mg/d) | Thyroxine<br>(mcg/d) | DDAVP |
|---------|------------|----------|-------------------------|-------------------------------|--------------------------|------------------------|---------------------------|-------------------------------------|-------------------------|----------------------------|------------------------|---------|--------------------------------|----------------------|----------------------|-------|
| 1       | 1/14/2008  | headache | 7                       | 24                            | 0.22                     | 4                      | 0.3                       | 0.1                                 | 0.4                     | 43                         | 2.3                    | -       | -                              | -                    | -                    | -     |
| 3       | 10/16/2008 | none     |                         |                               |                          |                        |                           |                                     |                         |                            |                        | 0       | -                              | 30                   | 75                   | yes   |
| 4       | 10/20/2008 | none     |                         |                               |                          |                        |                           |                                     |                         |                            |                        | 0       | -                              | 30                   | 75                   | yes   |
| 5       | 11/3/2008  | none     | 6                       | 22                            | 0.26                     | 9.3                    |                           |                                     | 0.6                     | 49                         |                        | 0       | -                              | 30                   | 75                   | yes   |
| 6       | 11/17/2008 | none     |                         |                               |                          |                        |                           |                                     |                         |                            |                        | 0       | -                              | 20                   | 75                   | yes   |
| 7       | 12/1/2008  | none     |                         |                               | 0.04                     | 7.7                    |                           | 0.3                                 | 0.3                     | 43                         | 3.2                    | 0       | -                              | 20                   | 75                   | yes   |
| 8       | 12/15/2008 | none     |                         |                               |                          |                        |                           |                                     |                         |                            |                        | 0       | -                              | 15                   | 75                   | yes   |
| 9       | 1/12/2009  | headache |                         |                               |                          |                        |                           |                                     |                         |                            |                        | 0       | -                              | 15                   | 75                   | yes   |
| 10      | 1/26/2009  | none     |                         |                               | 0.01                     | 7.6                    | 0.3                       |                                     | 0.3                     | 66                         | 4.8                    | 0       | -                              | 10                   | 75                   | yes   |
| 11      | 3/2/2009   | none     |                         |                               | 0.02                     | 7.7                    | 0.2                       | 0.1                                 | 0.39                    | 48                         | 2.3                    | -       | -                              | 5                    | 75                   | yes   |
| 12      | 4/20/2009  | none     |                         |                               | 0.02                     | 8                      | 0.1                       |                                     | 0.5                     | 68                         |                        | -       | 37.5                           | -                    | 75                   | yes   |
| 13      | 6/22/2009  | none     | 5                       | 24                            | 0.005                    | 7.4                    | 0.3                       | 0.1                                 | 0.15                    | 56                         |                        | -       | 37.5                           | -                    | 75                   | yes   |
| 14      | 10/20/2009 | none     |                         |                               | 0.039                    | 8.4                    | 0.3                       | 0.1                                 | 0.27                    | 40                         | 7.5                    | -       | 37.5                           | -                    | 75                   | yes   |
| 15      | 1/18/2010  | none     | 5                       | 20                            | 0.005                    | 7.5                    | 0.2                       | 0.1                                 | 0.22                    | 67                         | 2.1                    | 0       | 37.5                           | -                    | 75                   | no    |
| 16      | 8/7/2010   | none     | 5                       | 11                            | 0.015                    | 9.4                    | 0.5                       | 0.2                                 | 0.3                     | 76                         | 0.6                    | 0       | 37.5                           | -                    | 75                   | no    |
